# Supplementary material
Source: PubMed Central journal article supplement (PMC6490232)
Supplement: jamaoncol-5-864-s001.pdf [file jamaoncol-5-864-s001.pdf]

## Supplementary Online Content

Feijen EAM, Leisenring WM, Stratton KL, et al. Derivation of anthracycline and anthraquinone equivalence ratios to doxorubicin for late-onset cardiotoxicity. *JAMA Oncol*. Published online January 31, 2019. doi:10.1001/jamaoncol.2018.6634

**eTable 1.** Toxicity Equivalence Ratios Used by Various Clinical Groups for Assessment of Cardiotoxicity

**eTable 2.** Number of Survivors (%) Exposed to Chest Radiation and One or More Anthracyclines or Anthraquinone, N=28,423

**eTable 3.** Equivalence Ratios for Different Agents Relative to Doxorubicin After Excluding Survivors With any Chest Radiation

**eReferences**

This supplementary material has been provided by the authors to give readers additional information about their work.

**eTable 1.** Toxicity Equivalence Ratios Used by Various Clinical Groups for Assessment of Cardiotoxicity

| Group(s) using referenced ratio <sup>a</sup>            | Doxorubicin | Daunorubicin   | Epirubicin | Idarubicin | Mitoxantrone |
|---------------------------------------------------------|-------------|----------------|------------|------------|--------------|
| Berlin-Frankfurt-Münster (BFM) group <sup>1</sup>       | 1           | 1 (ref)        | -          | 5          | 5            |
| Bristol Royal Hospital for Sick Children <sup>2</sup>   | 1 (ref)     | 1              | 1          | -          | -            |
| Childhood Cancer Survivor Study <sup>3</sup>            | 1 (ref)     | 1              | -          | 3          | -            |
| Children's Oncology Group <sup>4</sup>                  | 1 (ref)     | 1 <sup>b</sup> | 0.67       | 5          | 4            |
| Dutch Childhood Oncology Group LATER <sup>5</sup>       | 1 (ref)     | 1              | 0.67       | -          | -            |
| Kyushu University, Fukuoka, Japan <sup>6</sup>          | 1 (ref)     | 1              | 1          | 1          | 1            |
| Sookmyung Women's University, Seoul, Korea <sup>7</sup> | 1 (ref)     | 0.5            | 0.5        | 2          | 2.2          |
| Taiwan Pediatric Oncology Group <sup>8</sup>            | 1 (ref)     | -              | -          | 3          | 2            |

<sup>a</sup> All ratios listed are based on hematologic toxicity equivalence rather than cardiac toxicity with the exception of Sookmyung Women's University (which is based on the ratio proposed by Keefe<sup>9</sup>).

<sup>b</sup> Ratio of 1 reported in the current version of the COG guidelines (version 4, October 2013); prior versions used 0.83.

**eTable 2.** Number of Survivors (%) Exposed to Chest Radiation and One or More Anthracyclines or Anthraquinone, N=28,423

|                 | N (%) <sup>a</sup> |              |              |            |            |              |
|-----------------|--------------------|--------------|--------------|------------|------------|--------------|
|                 | Chest radiation    | Doxorubicin  | Daunorubicin | Epirubicin | Idarubicin | Mitoxantrone |
| Chest radiation | 6,361 (21.2)       |              |              |            |            |              |
| Doxorubicin     | 2,198 (7.6)        | 9,330 (34.8) | -            | -          | -          | -            |
| Daunorubicin    | 738 (2.9)          | 1,505 (6.0)  | 4,433 (18.0) | -          | -          | -            |
| Epirubicin      | 49 (0.2)           | 28 (0.1)     | 6 (0.0)      | 342 (1.1)  | -          | -            |
| Idarubicin      | 70 (0.3)           | 64 (0.3)     | 158 (0.8)    | 1 (0.0)    | 241 (1.1)  | -            |
| Mitoxantrone    | 83 (0.3)           | 74 (0.3)     | 136 (0.5)    | 19 (0.1)   | 55 (0.2)   | 265 (0.9)    |

<sup>a</sup> Percentages may not match numbers, as percentages reflect weighting employed in the Childhood Cancer Survivor Study for patients with acute lymphoblastic leukemia, and exclude any participant with missing dose information.

**eTable 3.** Equivalence Ratios for Different Agents Relative to Doxorubicin After Excluding Survivors With any Chest Radiation

| Exposure     | No. clinical cardiomyopathy / No. dose information | Mean ratio (95% CI)           | Linear dose-response model ratio (95% CI) |
|--------------|----------------------------------------------------|-------------------------------|-------------------------------------------|
| Daunorubicin | 47 / 3,648                                         | 0.69 (0.39-1.28)              | 0.53 (0.36-0.72)                          |
| Epirubicin   | 8 / 293                                            | 0.86 (0.55-4.03)              | 0.74 (0.22-1.29)                          |
| Idarubicin   | 4 / 171                                            | Not estimable                 | Not estimable                             |
| Mitoxantrone | 18 / 182                                           | 22.2 (10.8-47.9) <sup>a</sup> | 22.6 (13.0-35.0) <sup>a</sup>             |

<sup>a</sup> Estimates shown account for a multiplication factor of 4

## REFERENCES

1. Creutzig U, Diekamp S, Zimmermann M, Reinhardt D. Longitudinal evaluation of early and late anthracycline cardiotoxicity in children with AML. *Pediatr Blood Cancer*. 2007;48(7):651-662.
2. Bu'Lock FA, Mott MG, Oakhill A, Martin RP. Left ventricular diastolic filling patterns associated with progressive anthracycline-induced myocardial damage: a prospective study. *Pediatr Cardiol*. 1999;20(4):252-263.
3. Mulrooney DA, Yeazel MW, Kawashima T, et al. Cardiac outcomes in a cohort of adult survivors of childhood and adolescent cancer: retrospective analysis of the Childhood Cancer Survivor Study cohort. *BMJ*. 2009;339:b4606.
4. Children's Oncology Group. Long-term follow-up guidelines for survivors of childhood, adolescent and young adult cancers, Version 4.0. <http://www.survivorshipguidelines.org/>. Accessed October 22, 2018.
5. van der Pal HJ, van Dalen EC, van DE, et al. High risk of symptomatic cardiac events in childhood cancer survivors. *J Clin Oncol*. 2012;30(13):1429-1437.
6. Godoy LY, Fukushige J, Igarashi H, Matsuzaki A, Ueda K. Anthracycline-induced cardiotoxicity in children with malignancies. *Acta Paediatr Jpn*. 1997;39(2):188-193.
7. Kang M, Kim KI, Song YC, Shin WG, Oh JM. Cardioprotective effect of early dexrazoxane use in anthracycline treated pediatric patients. *J Chemother*. 2012;24(5):292-296.
8. Liang DC, Chan TT, Lin KH, et al. Improved treatment results for childhood acute myeloid leukemia in Taiwan. *Leukemia*. 2006;20(1):136-141.
9. Keefe DL. Anthracycline-induced cardiomyopathy. *Semin Oncol*. 2001;28(4 Suppl 12):2-7.
